# Supplementary material for: In silico insights into the solvation characteristics of the ionic liquid 1-methyltriethoxy-3-ethylimidazolium acetate for cellulosic biomass
Source: Royal Society of Chemistry journal article supplement (doi:10.1039/c6cp03235d), 2016-01-01
Supplement: c6cp03235d1.pdf [file c6cp03235d1.pdf]

# *In Silico* Insights into the Solvation Characteristics of the Ionic Liquid 1-Methyltriethoxy-3- Ethylimidazolium Acetate for Cellulosic Biomass

## SUPPLEMENTAL INFORMATION

*Timothy C. Schutt, Vivek S. Bharadwaj, Govind A. Hegde, Adam J. Johns, and C. Mark Maupin\**

Chemical and Biological Engineering Department, Colorado School of Mines, 1500 Illinois  
Street, Golden, CO 80401

\*To whom correspondence should be addressed: CMM, Email [cmmaupin@mines.edu](mailto:cmmaupin@mines.edu). Phone:  
303-273-3197, Fax: 303-273-3730;

KEYWORDS: methyl tri-ethoxy ethyl imidazolium acetate, task-specific ILs, biofuels,  
molecular dynamics, metadynamics, umbrella sampling, Cremer Pople characterization.

## Supplemental Information

Table 1. List of charges calculated for the cation from OPLS-AA method (Sambasivarao, S. V.; Allen, C.; Acevedo, O., Development of OPLS-AA force field parameters for ionic liquid simulations and their applications in elimination reactions. *Abstracts of Papers of the American Chemical Society* 2013, 245.) and tail using corresponding MP2/ccVTZ RESP method.

| Atom Number | Atom Name | Atom Type | Charge |
|-------------|-----------|-----------|--------|
| 1           | C6        | c3        | -0.24  |
| 2           | H8        | hc        | 0.08   |
| 3           | H9        | hc        | 0.08   |
| 4           | H10       | hc        | 0.08   |
| 5           | C5        | c3        | -0.17  |
| 6           | H6        | h1        | 0.18   |
| 7           | H7        | h1        | 0.18   |
| 8           | N2        | na        | 0.22   |
| 9           | C4        | cd        | -0.09  |
| 10          | C3        | cc        | -0.24  |
| 11          | H4        | h4        | 0.27   |
| 12          | H5        | h4        | 0.27   |
| 13          | C2        | cc        | -0.24  |
| 14          | H3        | h5        | 0.27   |
| 15          | N1        | na        | 0.22   |
| 16          | C1        | c3        | -0.27  |
| 17          | H1        | h1        | 0.14   |
| 18          | H2        | h1        | 0.14   |
| 19          | C7        | c3        | 0.40   |
| 20          | H11       | h1        | 0.02   |
| 21          | H12       | h1        | 0.02   |
| 22          | O1        | os        | -0.50  |
| 23          | C8        | c3        | 0.15   |
| 24          | H13       | h1        | 0.03   |
| 25          | H14       | h1        | 0.03   |
| 26          | C9        | c3        | 0.33   |
| 27          | H15       | h1        | -0.02  |
| 28          | H16       | h1        | -0.02  |
| 29          | O2        | os        | -0.58  |
| 30          | C10       | c3        | 0.33   |
| 31          | H17       | h1        | -0.02  |
| 32          | H18       | h1        | -0.02  |
| 33          | C11       | c3        | 0.18   |
| 34          | H19       | h1        | 0.01   |
| 35          | H20       | h1        | 0.01   |
| 36          | O3        | os        | -0.43  |
| 37          | C12       | c3        | 0.08   |
| 38          | H21       | h1        | 0.04   |
| 39          | H22       | h1        | 0.04   |
| 40          | H23       | h1        | 0.04   |

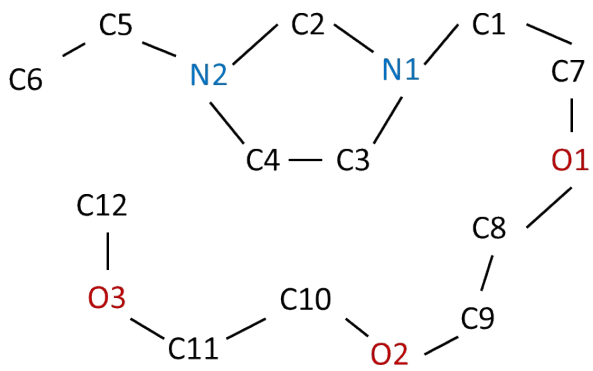

Figure 1. Map of cation showing atom names for use with table of charges.

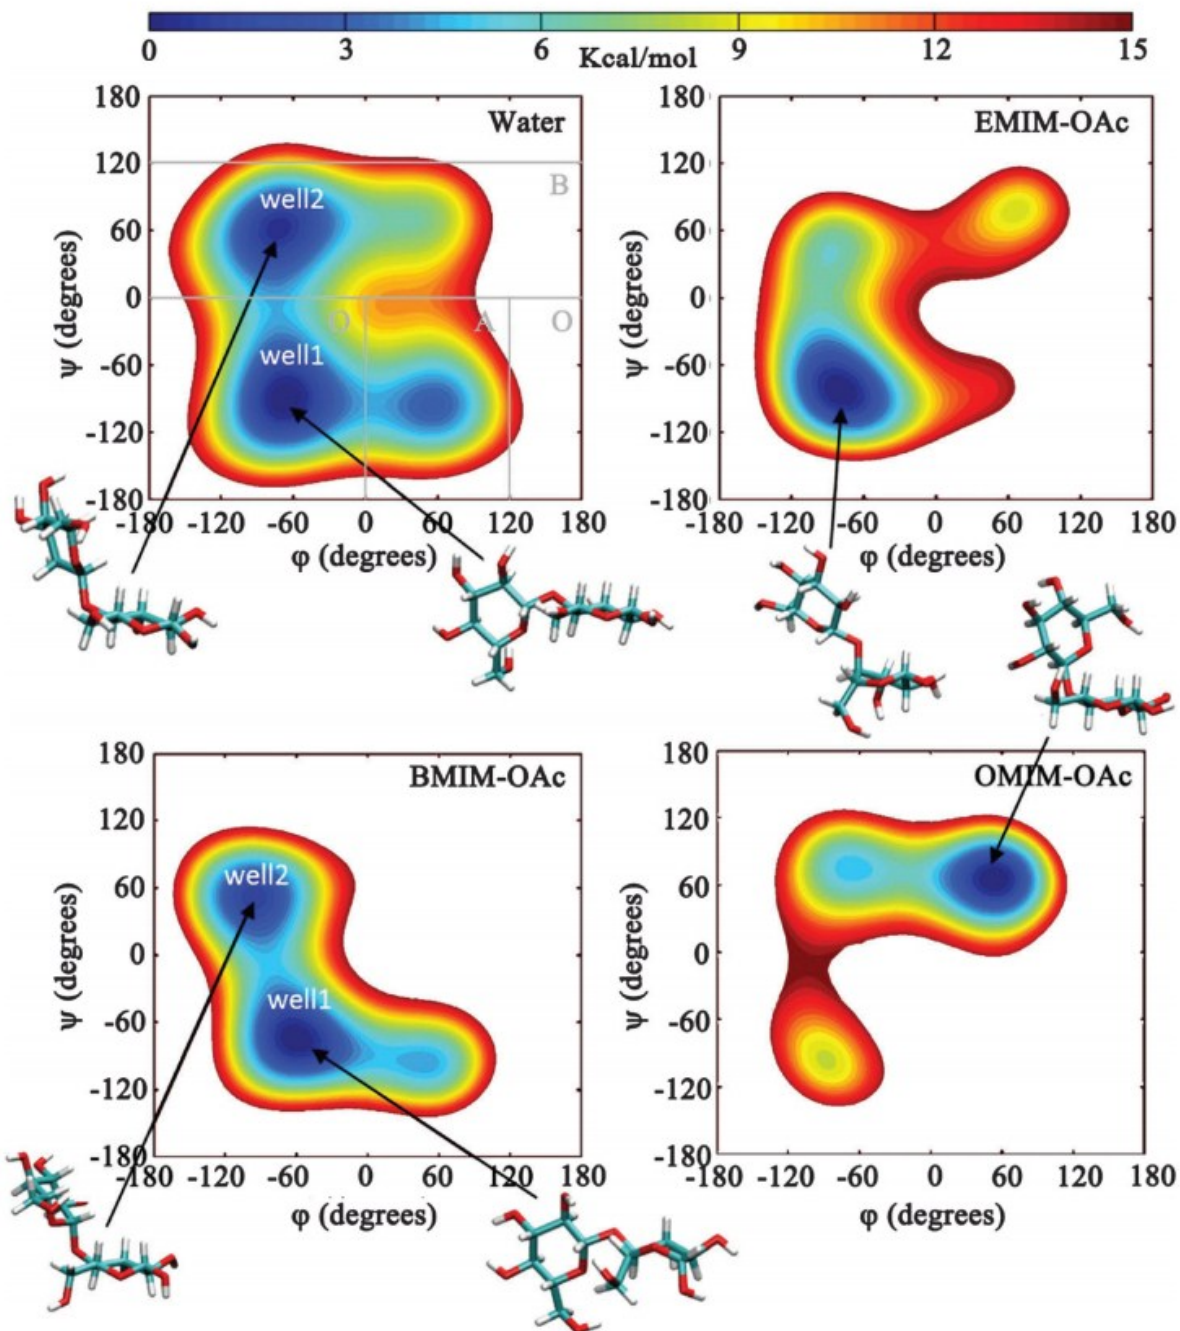

Figure 2. Free energy surfaces for cellobiose in water and dialkyl-imidazolium acetate ionic liquids from Bharadwaj, V. S.; Schutt, T. C.; Ashurst, T. C.; Maupin, C. M., Elucidating the conformational energetics of glucose and cellobiose in ionic liquids. *Physical Chemistry Chemical Physics* 2015, 17 (16), 10668-10678. Intended for comparison with free energy surface of the glycosidic bond of glucose in the oilgo(ethoxy) IL.

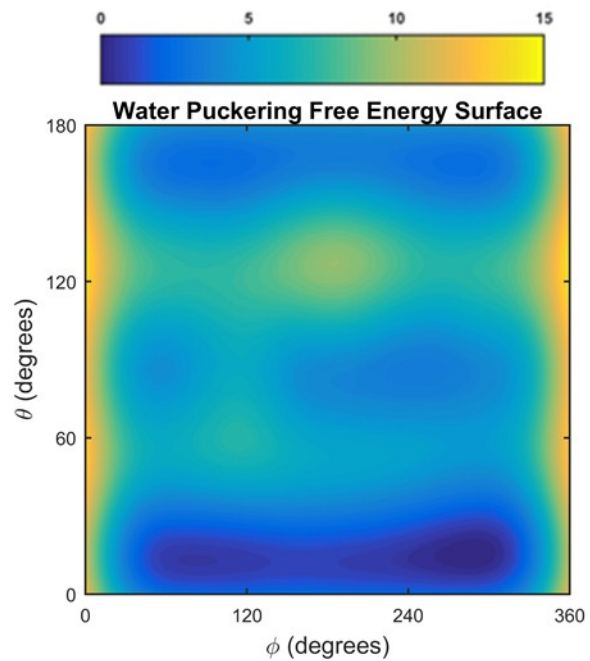

Figure 3. Free energy surface of the puckering coordinates for glucose in water showing strong energetic preference towards the  ${}^4C_1$  conformation (low  $\theta$  values).

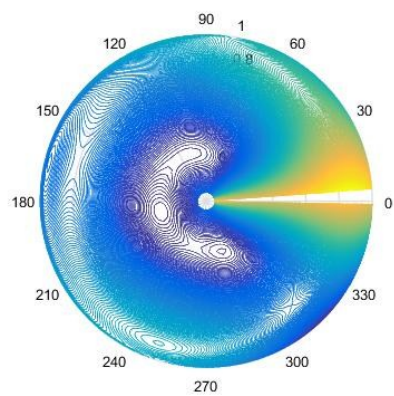

Figure 4. The free energy of ring puckering of glucose in  $[\text{Me}-(\text{OEt})_3\text{-Et-IM}^+][\text{OAc}^-]$  IL plotted as a top-down view of the northern hemisphere of the cremer-pople coordinates.
